# Supplementary material for: Transcriptomics Reveals the Effect of Short-Term Freezing on the Signal Transduction and Metabolism of Grapevine
Source: MDPI journal article supplement (doi:10.3390/ijms24043884), 2023-02-15
Supplement: s1 [file s1]

Table S1 KEGG enrichment analysis of DEGs under different freezing treatments

| Comparison groups | Pathway ID | Pathway                                               | P-value |
|-------------------|------------|-------------------------------------------------------|---------|
| CK-1-1 vs CK-2-1  | ko00040    | Pentose and glucuronate interconversions              | 0.000   |
|                   | ko00592    | alpha-Linolenic acid metabolism                       | 0.002   |
|                   | ko04712    | Circadian rhythm - plant                              | 0.002   |
|                   | ko01100    | Metabolic pathways                                    | 0.004   |
|                   | ko00941    | Flavonoid biosynthesis                                | 0.006   |
|                   | ko01110    | Biosynthesis of secondary metabolites                 | 0.045   |
| CK-1-2 vs CK-2-2  | ko01100    | Metabolic pathways                                    | 0.000   |
|                   | ko04712    | Circadian rhythm - plant                              | 0.000   |
|                   | ko00941    | Flavonoid biosynthesis                                | 0.000   |
|                   | ko00040    | Pentose and glucuronate interconversions              | 0.000   |
|                   | ko01110    | Biosynthesis of secondary metabolites                 | 0.000   |
|                   | ko00945    | Stilbenoid, diarylheptanoid and gingerol biosynthesis | 0.000   |
|                   | ko00592    | alpha-Linolenic acid metabolism                       | 0.000   |
|                   | ko00460    | Cyanoamino acid metabolism                            | 0.001   |
|                   | ko00520    | Amino sugar and nucleotide sugar metabolism           | 0.003   |
|                   | ko00591    | Linoleic acid metabolism                              | 0.005   |
|                   | ko00130    | Ubiquinone and other terpenoid-quinone biosynthesis   | 0.022   |
|                   | ko00073    | Cutin, suberine and wax biosynthesis                  | 0.026   |
| CK-1-3 vs CK-2-3  | ko00941    | Flavonoid biosynthesis                                | 0.000   |
|                   | ko01110    | Biosynthesis of secondary metabolites                 | 0.000   |
|                   | ko01100    | Metabolic pathways                                    | 0.000   |
|                   | ko04712    | Circadian rhythm - plant                              | 0.000   |
|                   | ko00196    | Photosynthesis - antenna proteins                     | 0.000   |
|                   | ko00010    | Glycolysis / Gluconeogenesis                          | 0.000   |
|                   | ko00270    | Cysteine and methionine metabolism                    | 0.000   |
|                   | ko01230    | Biosynthesis of amino acids                           | 0.001   |
|                   | ko00360    | Phenylalanine metabolism                              | 0.001   |
|                   | ko00350    | Tyrosine metabolism                                   | 0.002   |
|                   | ko00520    | Amino sugar and nucleotide sugar metabolism           | 0.003   |
|                   | ko00052    | Galactose metabolism                                  | 0.004   |
|                   | ko04075    | Plant hormone signal transduction                     | 0.008   |
|                   | ko00920    | Sulfur metabolism                                     | 0.013   |
|                   | ko00053    | Ascorbate and aldarate metabolism                     | 0.014   |
|                   | ko00950    | Isoquinoline alkaloid biosynthesis                    | 0.016   |
|                   | ko00940    | Phenylpropanoid biosynthesis                          | 0.016   |
|                   | ko04016    | MAPK signaling pathway - plant                        | 0.031   |
|                   | ko00944    | Flavone and flavonol biosynthesis                     | 0.033   |
|                   | ko00945    | Stilbenoid, diarylheptanoid and gingerol              | 0.035   |

|                  |         |                                                        |       |
|------------------|---------|--------------------------------------------------------|-------|
|                  |         | biosynthesis                                           |       |
|                  | ko00480 | Glutathione metabolism                                 | 0.036 |
|                  | ko00592 | alpha-Linolenic acid metabolism                        | 0.037 |
|                  | ko00960 | Tropane, piperidine and pyridine alkaloid biosynthesis | 0.038 |
|                  | ko04141 | Protein processing in endoplasmic reticulum            | 0.039 |
|                  | ko00195 | Photosynthesis                                         | 0.041 |
| CK-1-1 vs CK-1-2 | ko01100 | Metabolic pathways                                     | 0.000 |
|                  | ko00040 | Pentose and glucuronate interconversions               | 0.000 |
|                  | ko00592 | alpha-Linolenic acid metabolism                        | 0.001 |
|                  | ko00591 | Linoleic acid metabolism                               | 0.001 |
|                  | ko01110 | Biosynthesis of secondary metabolites                  | 0.001 |
|                  | ko00460 | Cyanoamino acid metabolism                             | 0.001 |
|                  | ko00350 | Tyrosine metabolism                                    | 0.005 |
|                  | ko00520 | Amino sugar and nucleotide sugar metabolism            | 0.019 |
|                  | ko00270 | Cysteine and methionine metabolism                     | 0.027 |
| CK-1-1 vs CK-1-3 | ko01110 | Biosynthesis of secondary metabolites                  | 0.000 |
|                  | ko00196 | Photosynthesis - antenna proteins                      | 0.001 |
|                  | ko00592 | alpha-Linolenic acid metabolism                        | 0.001 |
|                  | ko00941 | Flavonoid biosynthesis                                 | 0.002 |
|                  | ko00460 | Cyanoamino acid metabolism                             | 0.003 |
|                  | ko00071 | Fatty acid degradation                                 | 0.004 |
|                  | ko00350 | Tyrosine metabolism                                    | 0.009 |
|                  | ko04016 | MAPK signaling pathway - plant                         | 0.011 |
|                  | ko01100 | Metabolic pathways                                     | 0.022 |
|                  | ko00010 | Glycolysis / Gluconeogenesis                           | 0.023 |
|                  | ko00330 | Arginine and proline metabolism                        | 0.037 |
|                  | ko00040 | Pentose and glucuronate interconversions               | 0.038 |
|                  | ko00270 | Cysteine and methionine metabolism                     | 0.046 |
|                  | ko00920 | Sulfur metabolism                                      | 0.049 |
| CK-1-2 vs CK-1-3 | ko01110 | Biosynthesis of secondary metabolites                  | 0.000 |
|                  | ko00941 | Flavonoid biosynthesis                                 | 0.000 |
|                  | ko01100 | Metabolic pathways                                     | 0.000 |
|                  | ko04712 | Circadian rhythm - plant                               | 0.000 |
|                  | ko00040 | Pentose and glucuronate interconversions               | 0.000 |
|                  | ko00052 | Galactose metabolism                                   | 0.000 |
|                  | ko00073 | Cutin, suberine and wax biosynthesis                   | 0.000 |
|                  | ko00591 | Linoleic acid metabolism                               | 0.003 |
|                  | ko00460 | Cyanoamino acid metabolism                             | 0.004 |
|                  | ko00592 | alpha-Linolenic acid metabolism                        | 0.006 |
|                  | ko00940 | Phenylpropanoid biosynthesis                           | 0.014 |
|                  | ko00945 | Stilbenoid, diarylheptanoid and gingerol biosynthesis  | 0.017 |
|                  | ko00960 | Tropane, piperidine and pyridine alkaloid              | 0.018 |

|                  |         |                                                       |       |
|------------------|---------|-------------------------------------------------------|-------|
| <hr/>            |         |                                                       |       |
|                  |         | biosynthesis                                          |       |
| CK-2-1 vs CK-2-2 | ko00942 | Anthocyanin biosynthesis                              | 0.029 |
|                  | ko00040 | Pentose and glucuronate interconversions              | 0.000 |
|                  | ko00591 | Linoleic acid metabolism                              | 0.001 |
|                  | ko00592 | alpha-Linolenic acid metabolism                       | 0.015 |
|                  | ko04075 | Plant hormone signal transduction                     | 0.029 |
|                  | ko01100 | Metabolic pathways                                    | 0.035 |
| <hr/>            |         |                                                       |       |
| CK-2-1 vs CK-2-3 | ko00040 | Pentose and glucuronate interconversions              | 0.000 |
|                  | ko00591 | Linoleic acid metabolism                              | 0.001 |
|                  | ko00592 | alpha-Linolenic acid metabolism                       | 0.015 |
|                  | ko04075 | Plant hormone signal transduction                     | 0.029 |
|                  | ko01100 | Metabolic pathways                                    | 0.035 |
| <hr/>            |         |                                                       |       |
| CK-2-2 vs CK-2-3 | ko01110 | Biosynthesis of secondary metabolites                 | 0.000 |
|                  | ko00941 | Flavonoid biosynthesis                                | 0.000 |
|                  | ko00940 | Phenylpropanoid biosynthesis                          | 0.000 |
|                  | ko01100 | Metabolic pathways                                    | 0.000 |
|                  | ko00040 | Pentose and glucuronate interconversions              | 0.001 |
|                  | ko04712 | Circadian rhythm - plant                              | 0.001 |
|                  | ko04016 | MAPK signaling pathway - plant                        | 0.002 |
|                  | ko00360 | Phenylalanine metabolism                              | 0.002 |
|                  | ko04075 | Plant hormone signal transduction                     | 0.005 |
|                  | ko03030 | DNA replication                                       | 0.007 |
|                  | ko00920 | Sulfur metabolism                                     | 0.010 |
|                  | ko00945 | Stilbenoid, diarylheptanoid and gingerol biosynthesis | 0.011 |
|                  | ko00520 | Amino sugar and nucleotide sugar metabolism           | 0.013 |
|                  | ko00350 | Tyrosine metabolism                                   | 0.014 |
|                  | ko00270 | Cysteine and methionine metabolism                    | 0.017 |
|                  | ko00010 | Glycolysis / Gluconeogenesis                          | 0.017 |
|                  | ko00071 | Fatty acid degradation                                | 0.023 |
|                  | ko00910 | Nitrogen metabolism                                   | 0.024 |
|                  | ko00592 | alpha-Linolenic acid metabolism                       | 0.047 |
| <hr/>            |         |                                                       |       |
