# Supplementary figures and images for: Transcriptomics Reveals the Effect of Short-Term Freezing on the Signal Transduction and Metabolism of Grapevine
Source: MDPI journal article supplement (doi:10.3390/ijms24043884), 2023-02-15

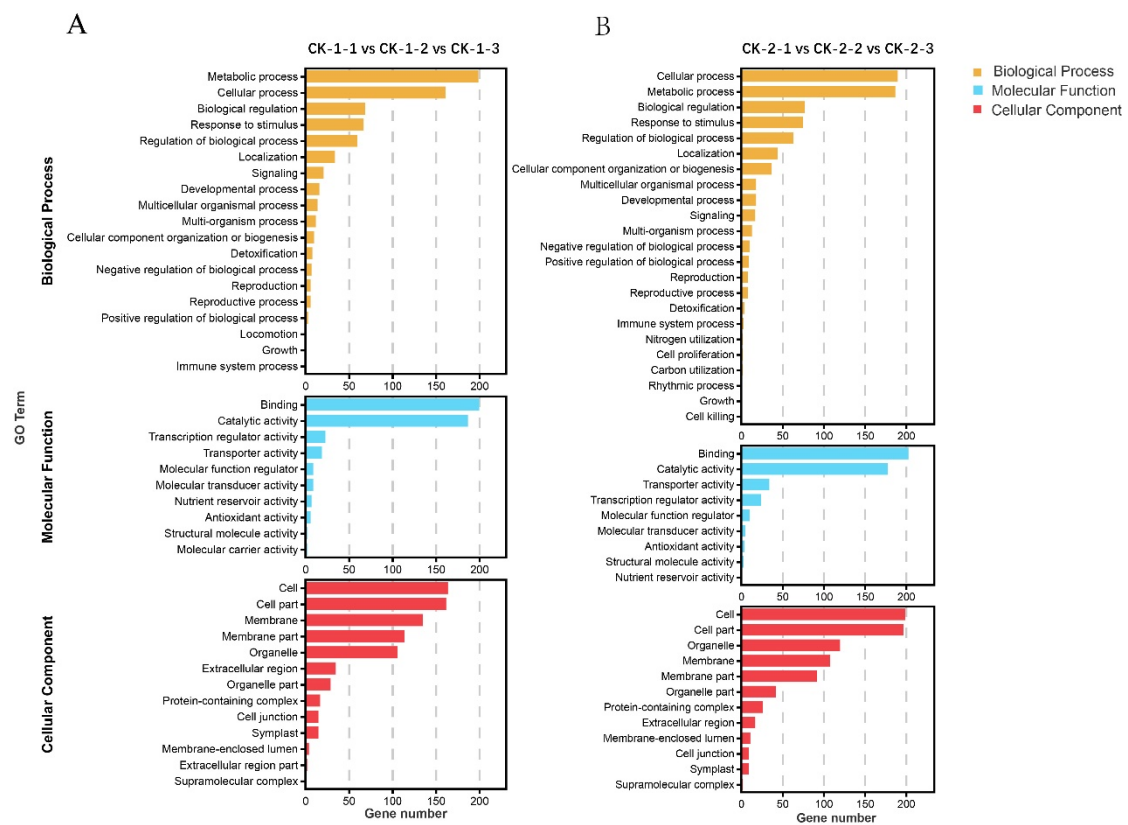

Figure S1 GO functional annotation analysis of DEGs in profile3 under different stress times

Supplement: s1 [file s1]
